# Supplementary material for: Human Q fever incidence is associated to spatiotemporal environmental conditions
Source: PubMed Central journal article supplement — One Health. 2016 Apr 4;2:77–87. doi: 10.1016/j.onehlt.2016.03.004 (PMC5441340; doi:10.1016/j.onehlt.2016.03.004), 2016-04-04

Mean SM [%] per km<sup>2</sup> (2009 – 1)

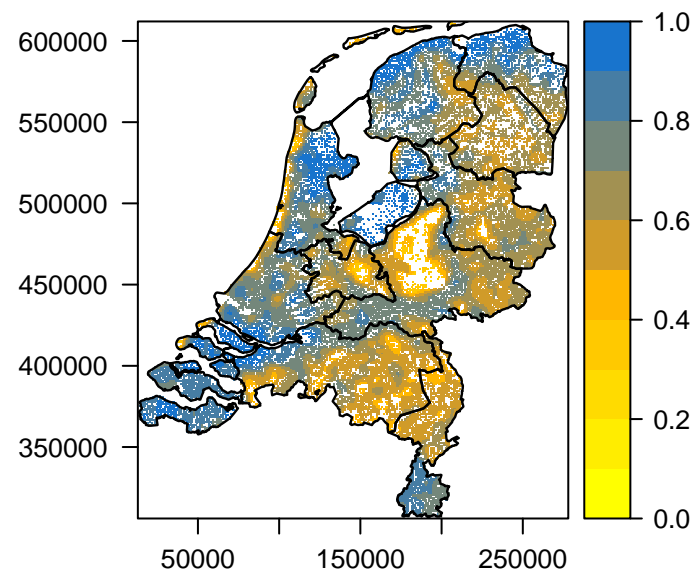

Mean SM [%] per km<sup>2</sup> (2009 – 2)

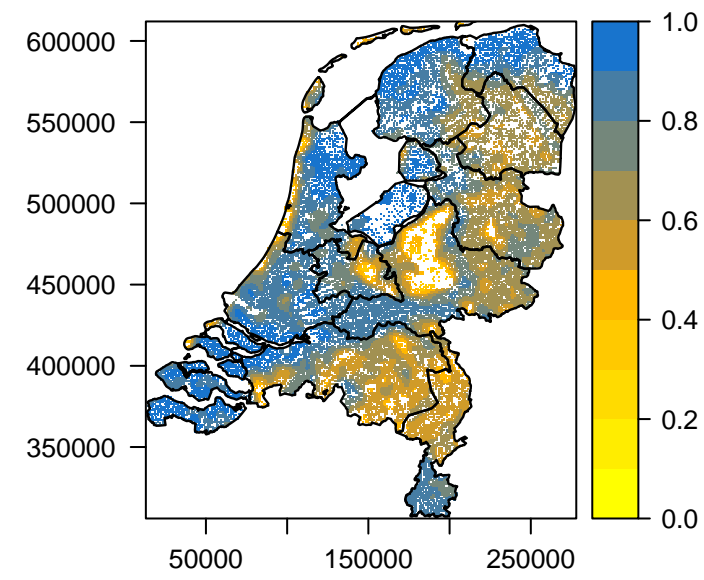

Mean SM [%] per km<sup>2</sup> (2009 – 3)

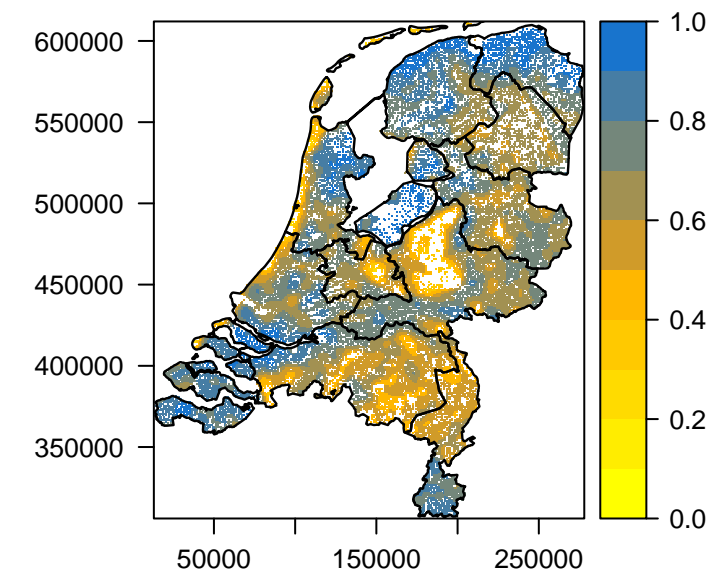

Mean SM [%] per km<sup>2</sup> (2009 – 4)

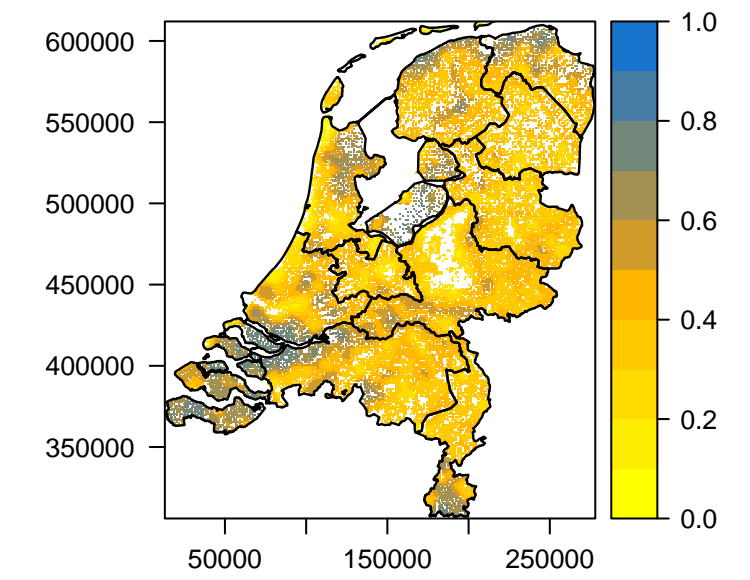

Mean SM [%] per km<sup>2</sup> (2009 – 5)

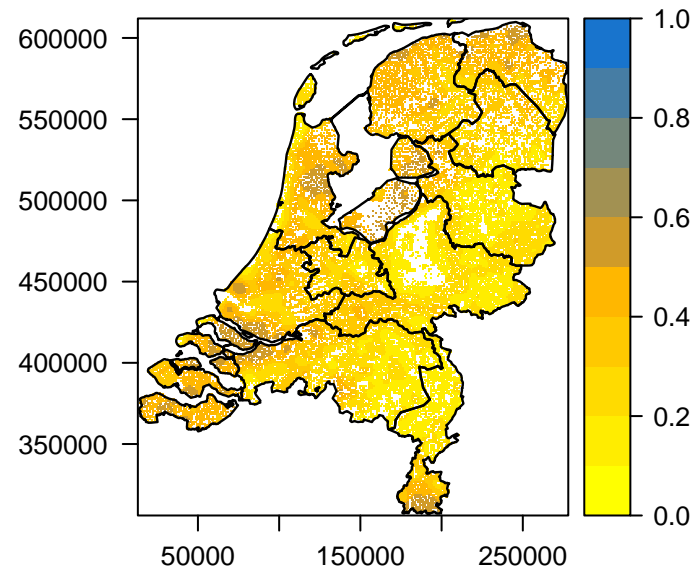

Mean SM [%] per km<sup>2</sup> (2009 – 6)

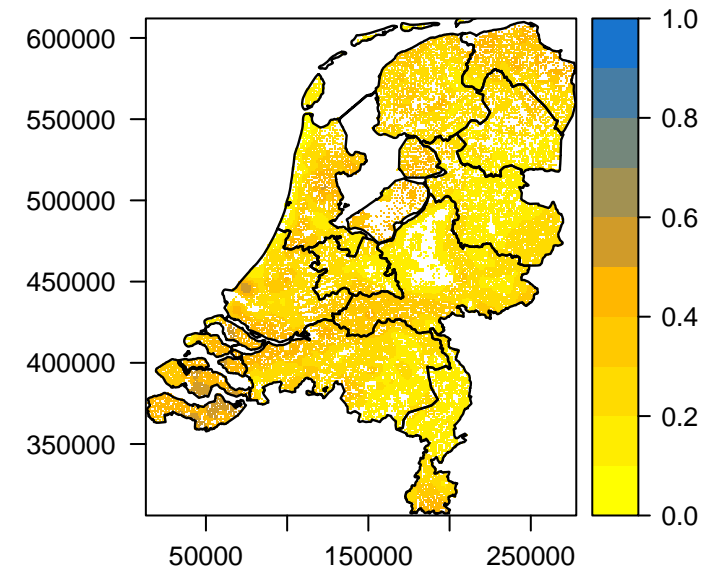

Mean SM [%] per km<sup>2</sup> (2009 – 7)

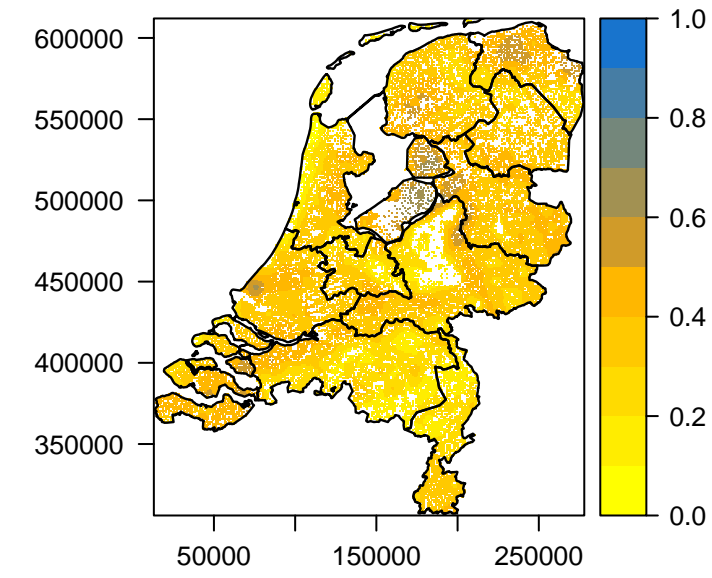

Mean SM [%] per km<sup>2</sup> (2009 – 8)

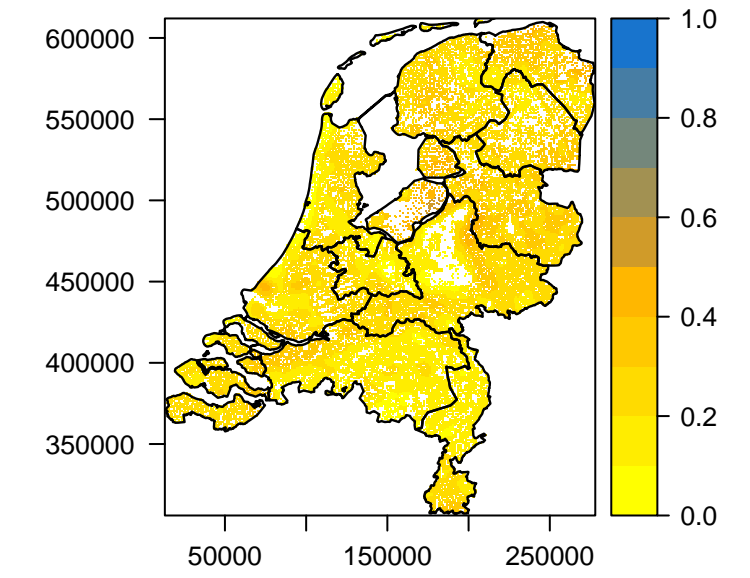

Mean SM [%] per km<sup>2</sup> (2009 – 9)

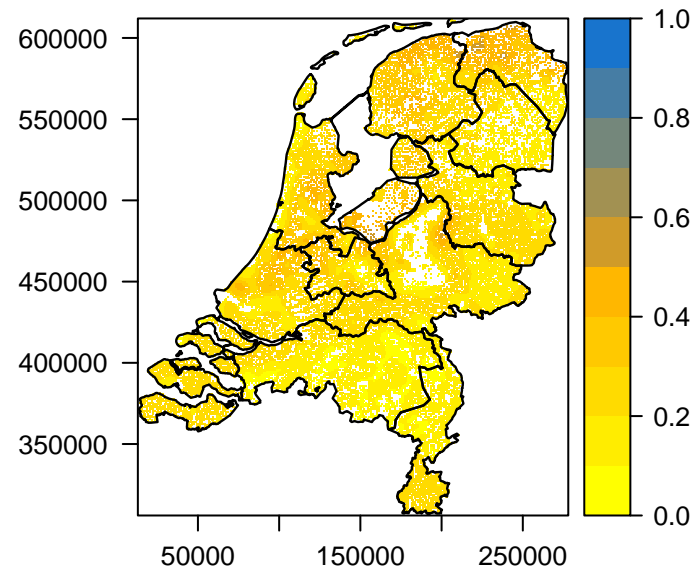

Mean SM [%] per km<sup>2</sup> (2009 – 10)

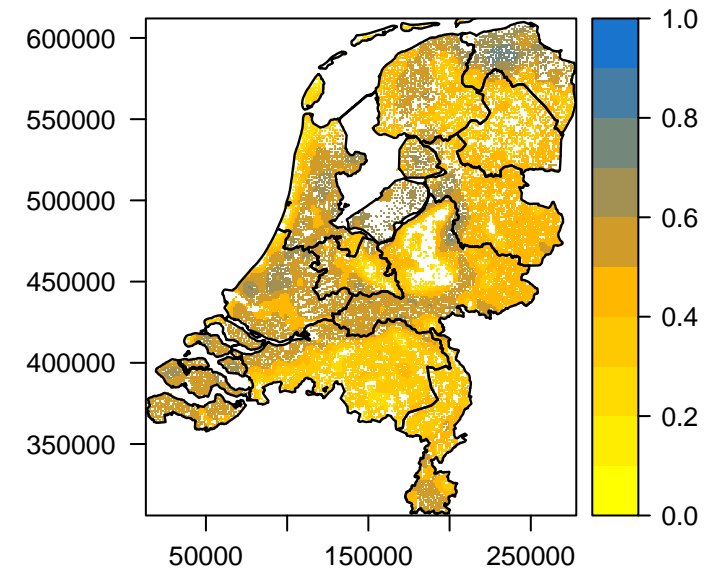

Mean SM [%] per km<sup>2</sup> (2009 – 11)

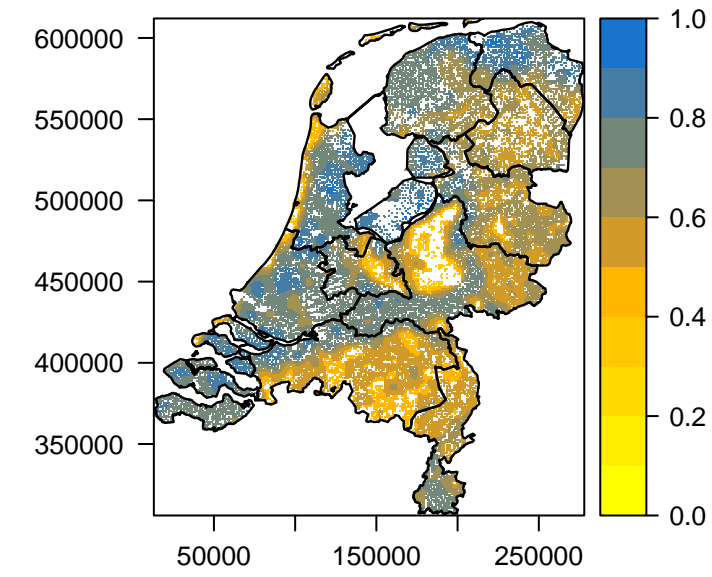

Mean SM [%] per km<sup>2</sup> (2009 – 12)

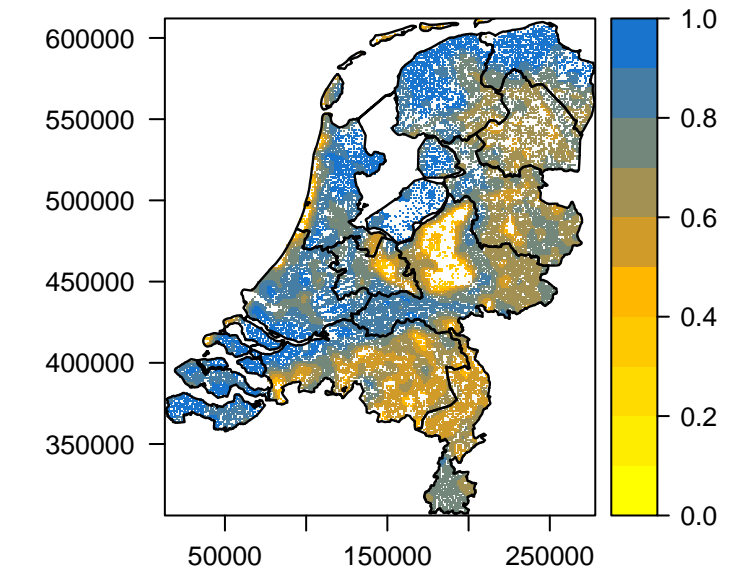

Supplement: mmc6.pdf [file mmc6.pdf]
