# Supplementary material for: Human Q fever incidence is associated to spatiotemporal environmental conditions
Source: PubMed Central journal article supplement — One Health. 2016 Apr 4;2:77–87. doi: 10.1016/j.onehlt.2016.03.004 (PMC5441340; doi:10.1016/j.onehlt.2016.03.004), 2016-04-04

## Legend

Water

## Soil Erosion Sensitivity

Grass

Arable - Low

Arable - Medium

Arable - High

Nature - Low

Nature - Medium

Nature - High

Urban areas

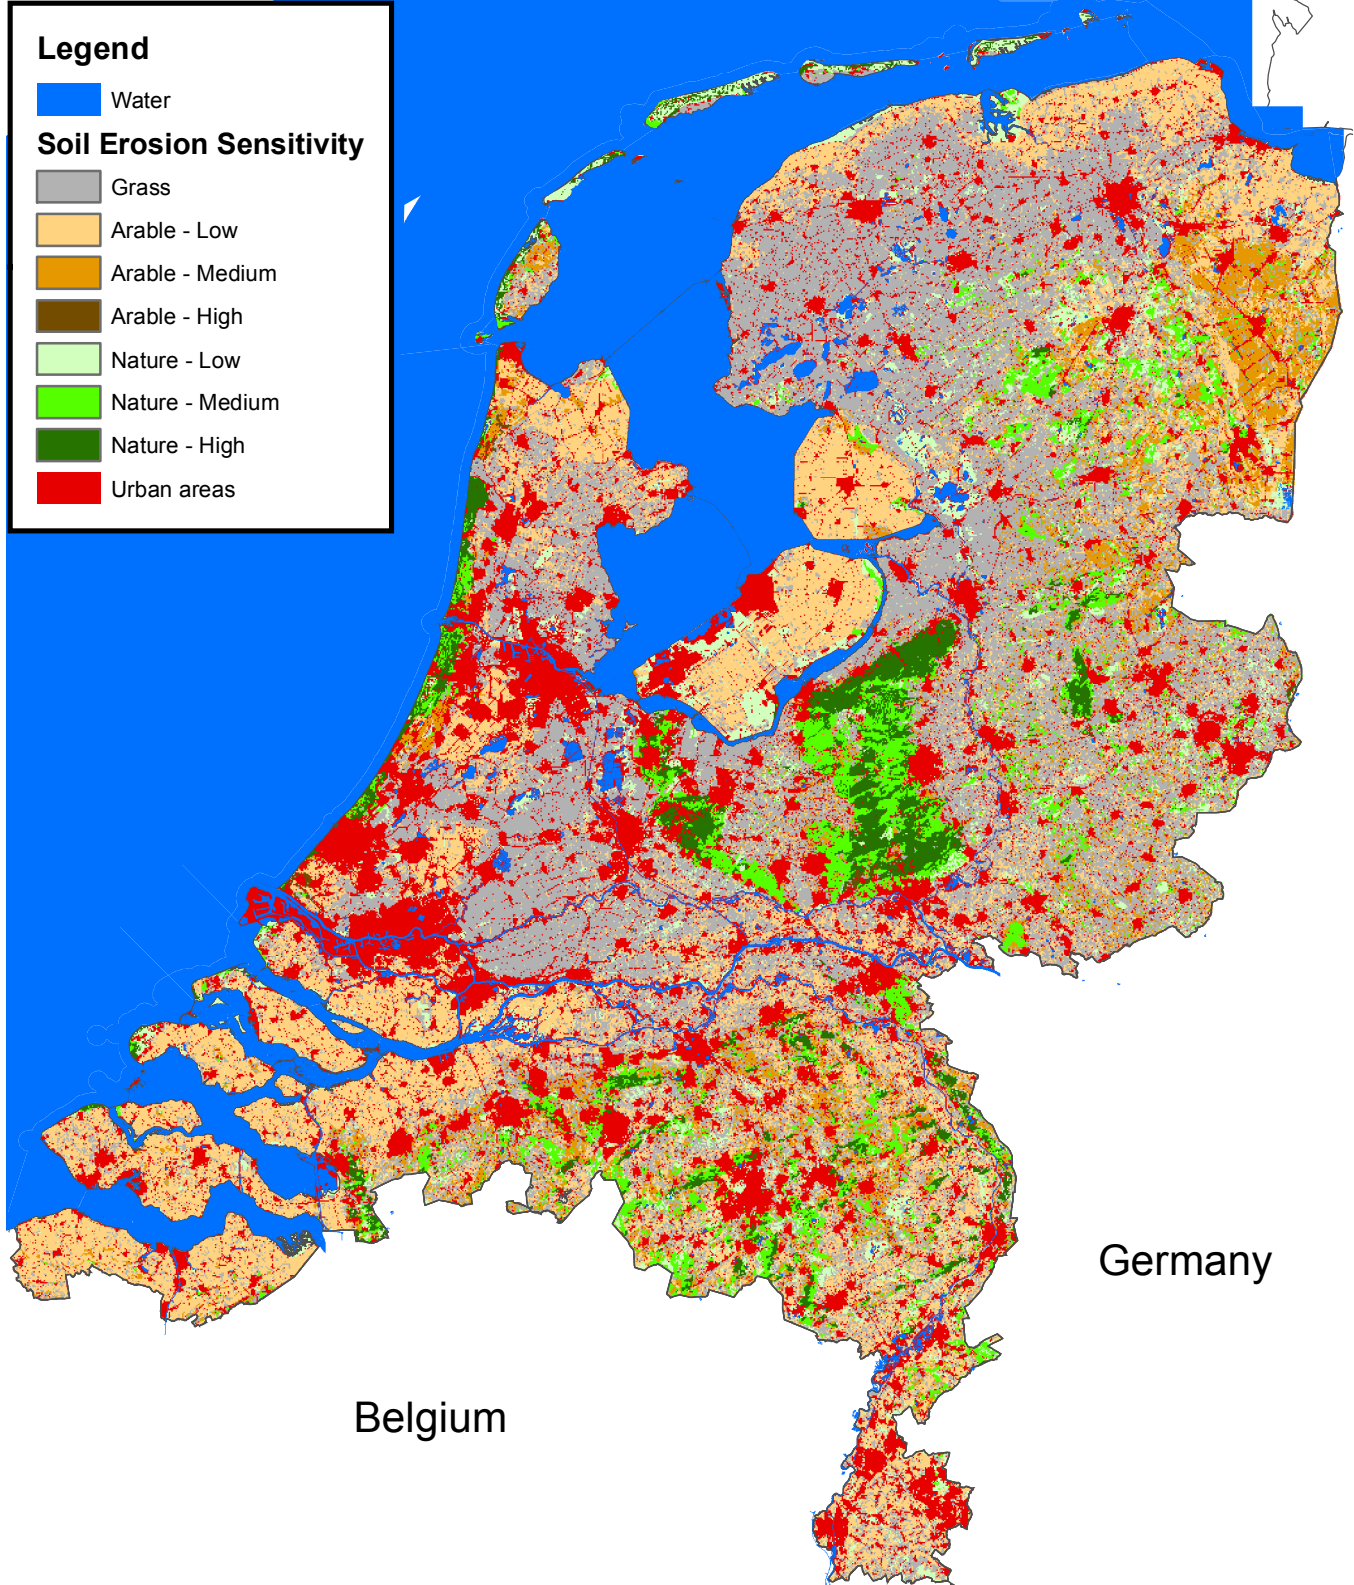

Supplement: mmc8.pdf [file mmc8.pdf]
