# Supplementary material for: Human Q fever incidence is associated to spatiotemporal environmental conditions
Source: PubMed Central journal article supplement — One Health. 2016 Apr 4;2:77–87. doi: 10.1016/j.onehlt.2016.03.004 (PMC5441340; doi:10.1016/j.onehlt.2016.03.004), 2016-04-04
Supplement: mmc9.pdf [file mmc9.pdf]

|                                    |         |         |             |     |         |         |             |         |         |         |      |         |         |
|------------------------------------|---------|---------|-------------|-----|---------|---------|-------------|---------|---------|---------|------|---------|---------|
| Concentration                      |         |         |             |     |         |         |             |         |         |         |      |         |         |
| Leaf Area Index                    | 0.3     |         | 0.3         | 1.7 |         |         |             |         | 0.3     | 0.3     | 0.3  |         |         |
| Soil Moisture                      | 3.7e+08 | 5.6e+03 | # 4.3e+05 # |     | 9.5e+11 |         | # 1.2e+03 # | 2.2e+08 | 0.0     |         |      | 653.9   | 9.2e+03 |
| Soil erosion sensitivity: Low      | 3.1e+09 |         | 2.5e+04     |     | 0.0     | 0.0     |             | 0.0     | 0.0     | 8.8e+03 | 0.0  | 2.8e+05 | 0.0     |
| Soil erosion sensitivity: Moderate | 0.0     | 0.0     | 0.0         |     | 0.3     |         | 0.1         | 0.0     | 0.0     |         |      | 0.1     | 0.1     |
| Soil erosion sensitivity: High     |         | 0.5     | 0.6         |     |         | 7.4e+07 |             |         |         |         | 16.9 |         |         |
| Land use fraction: agriculture     | 0.0     | 0.1     | 0.0         | 0.0 | 0.0     | 0.0     | 0.0         | 163.0   |         |         |      | 0.3     | 0.1     |
| Land use fraction: forest          | 0.0     | 6.3e+05 |             |     | 0.0     |         |             | 0.0     | 0.2     |         |      | 0.1     |         |
| Land use fraction: open nature     |         |         |             |     |         |         |             | 3.2e+06 | 0.5     |         |      |         | 31.9    |
| Land use fraction: water           |         |         |             |     | 7.3e+03 |         | 17.6        | 1.5e+03 | 1.7e+03 |         |      |         | 5.3     |
| Land use fraction: city            | 0.0     | 0.0     | 0.0         |     | 0.0     |         |             | 0.0     | 0.0     | 0.0     | 0.0  | 0.0     | 0.0     |
|                                    | Year    | Jan     | Feb         | Mar | Apr     | May     | Jun         | Jul     | Aug     | Sep     | Oct  | Nov     | Dec     |
