# Supplementary material for: Human Q fever incidence is associated to spatiotemporal environmental conditions
Source: PubMed Central journal article supplement — One Health. 2016 Apr 4;2:77–87. doi: 10.1016/j.onehlt.2016.03.004 (PMC5441340; doi:10.1016/j.onehlt.2016.03.004), 2016-04-04
Supplement: mmc10.pdf [file mmc10.pdf]

|                                    |      |         |          |          |         |         |         |     |     |         |     |         |         |
|------------------------------------|------|---------|----------|----------|---------|---------|---------|-----|-----|---------|-----|---------|---------|
| Concentration                      | 1.9  | 2.3     | 2.2      | 2.0      | 2.1     | 2.0     | 2.1     | 2.0 | 1.8 | 2.0     | 1.7 | 1.7     | 1.6     |
| Leaf Area Index                    | 0.7  | 0.7     | 0.6      | 0.8      | 0.8     | 0.8     | 0.8     | 0.8 | 0.9 | # 0.7 # | 0.6 | 0.6     | 0.9     |
| Soil Moisture                      | 0.0  |         | # 26.8 # | 0.0      | 55.8    |         |         | 0.0 | 0.0 | 0.0     |     |         |         |
| Soil erosion sensitivity: Low      | 1.3  |         | 14.8     |          | 0.2     | 0.3     |         | 0.4 | 0.3 | 12.3    | 0.2 | 96.5    | 0.2     |
| Soil erosion sensitivity: Moderate | 4.0  |         | # 0.3 #  | # 29.9 # | # 3.5 # | 6.1     | # 1.8 # | 2.7 |     | 3.4     | 7.0 |         |         |
| Soil erosion sensitivity: High     | 1.8  |         |          | # 2.4 #  | # 1.8 # | 1.9     | # 1.8 # | 1.8 | 1.6 | 1.8     | 2.8 | 1.5     | 1.4     |
| Land use fraction: agriculture     |      | # 0.5 # |          |          |         |         |         | 1.9 | 1.2 | 1.4     | 1.4 | # 0.6 # | # 0.5 # |
| Land use fraction: forest          | 2.1  | 8.6     |          |          | 2.4     | # 2.9 # |         |     |     |         | 6.1 |         |         |
| Land use fraction: open nature     | 0.8  |         | # 0.6 #  | 0.8      | 0.7     | # 0.9 # | # 0.7 # |     | 0.5 |         |     |         | 2.6     |
| Land use fraction: water           | 0.8  | 0.6     |          | 0.8      |         | # 0.7 # | # 1.5 # |     |     |         | 0.8 |         | 1.6     |
| Land use fraction: city            | 0.6  | 0.1     | 0.1      |          | 0.6     | # 0.7 # | # 0.6 # | 0.2 | 0.1 | 0.1     | 0.1 | 0.0     | 0.1     |
|                                    | Year | Jan     | Feb      | Mar      | Apr     | May     | Jun     | Jul | Aug | Sep     | Oct | Nov     | Dec     |
