# Supplementary material for: Human Q fever incidence is associated to spatiotemporal environmental conditions
Source: PubMed Central journal article supplement — One Health. 2016 Apr 4;2:77–87. doi: 10.1016/j.onehlt.2016.03.004 (PMC5441340; doi:10.1016/j.onehlt.2016.03.004), 2016-04-04
Supplement: mmc11.pdf [file mmc11.pdf]

|                                |         |         |     |     |         |         |         |             |             |         |         |             |     |
|--------------------------------|---------|---------|-----|-----|---------|---------|---------|-------------|-------------|---------|---------|-------------|-----|
| (Intercept)                    |         |         | 0.0 | 0.0 |         | 0.0     | 0.0     | # 1.1e+40 # | # 1.4e+37 # |         | 0.0     | # 4.1e+14 # |     |
| Concentration                  | 0.6     | 12.9    | 0.5 |     | 0.0     |         |         | # 0.4 #     |             |         |         |             |     |
| Leaf Area Index                | 0.3     | 0.0     | 0.5 |     |         | 0.0     | 0.1     | # 0.5 #     | # 0.4 #     |         |         | # 0.3 #     |     |
| Soil moisture                  | 1.6e+16 |         |     |     | 2.0e+59 |         |         |             | # 5.6e+07 # |         | 0.0     | # 6.0e+14 # |     |
| Soil Erosion Sensitivity: High | 177.5   |         |     |     | 4.9e+03 | 7.8e+19 | 74.5    |             |             |         | 0.2     |             |     |
| Soil Erosion Sensitivity: Low  | 0.0     |         |     |     | 0.0     |         |         | # 0.0 #     | # 0.0 #     |         | 7.0e+05 | # 0.0 #     |     |
| Land use fraction: forest      | 74.5    | 3.4e+06 |     |     | 0.0     |         |         |             |             |         |         |             |     |
| Land use fraction: nature      |         |         | 0.2 |     |         | 1.2e+32 |         |             |             |         |         |             |     |
| Land use fraction: water       | 0.0     | 1.9e+06 |     |     |         | 3.3e+71 | 2.0e+29 | 3.8e+33     |             |         |         |             |     |
| Land use fraction: city        |         |         |     |     | 2.1e+14 |         |         |             | # 0.0 #     | # 0.0 # |         | # 0.0 #     |     |
|                                | Year    | Jan     | Feb | Mar | Apr     | May     | Jun     | Jul         | Aug         | Sep     | Oct     | Nov         | Dec |
