# Supplementary figures and images for: Human Q fever incidence is associated to spatiotemporal environmental conditions
Source: PubMed Central journal article supplement — One Health. 2016 Apr 4;2:77–87. doi: 10.1016/j.onehlt.2016.03.004 (PMC5441340; doi:10.1016/j.onehlt.2016.03.004), 2016-04-04

Mean modelled  $\log(\text{CONC})$  [-] per  $\text{km}^2$  (2009)

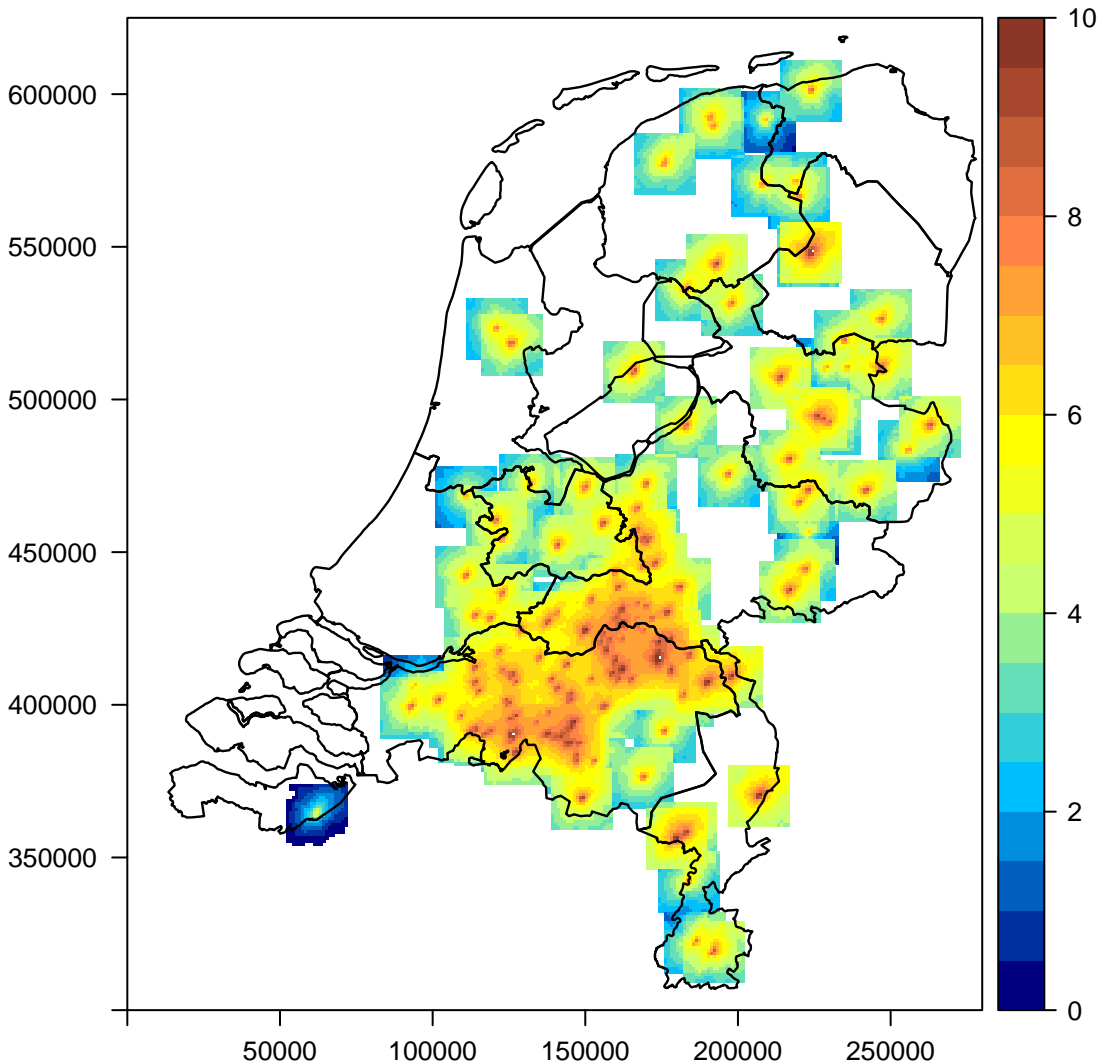

Supplement: mmc1.pdf [file mmc1.pdf]

**Observed incidence**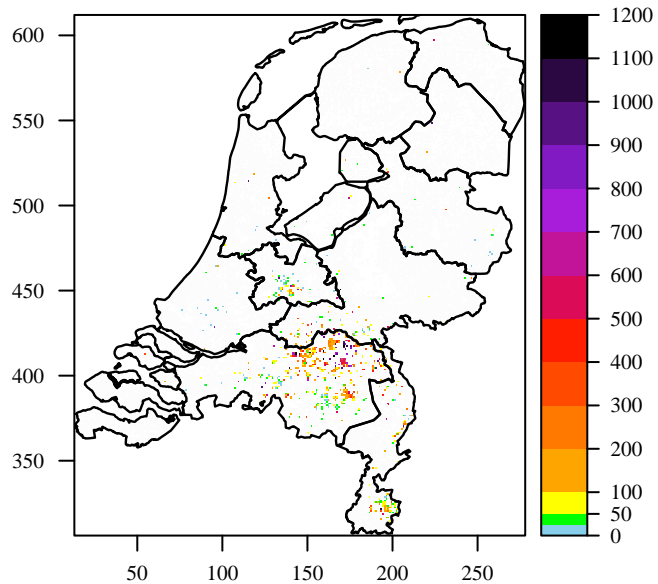**Predicted incidence**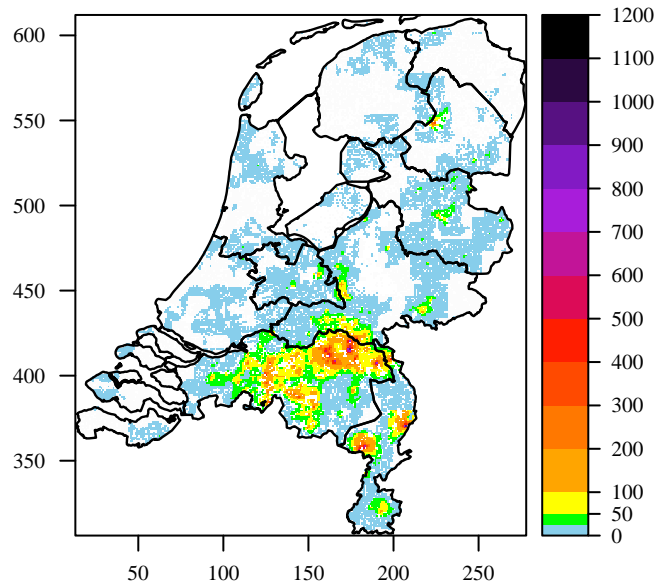**Residuals**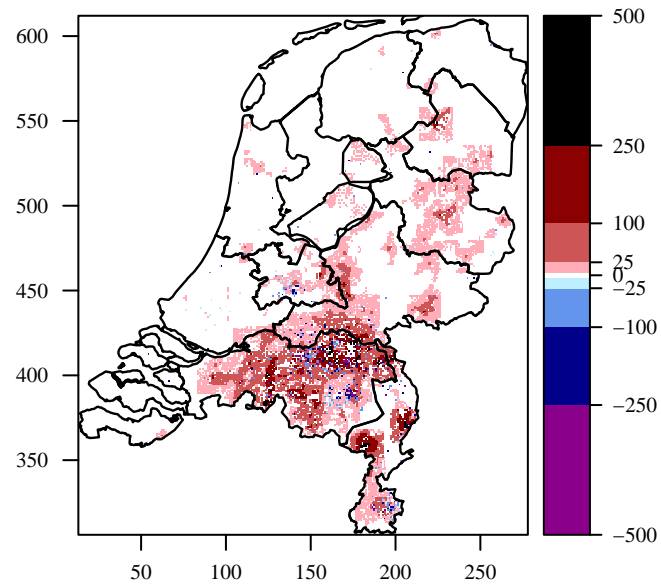

Supplement: mmc12.pdf [file mmc12.pdf]

**Observed incidence**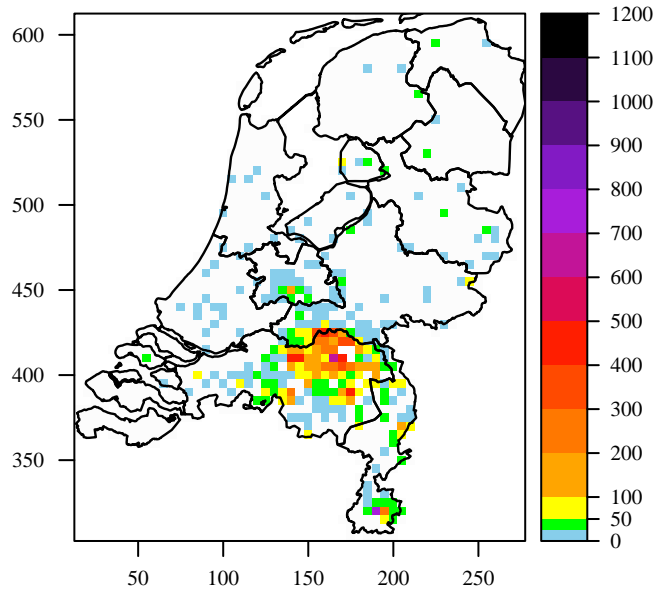**Predicted incidence**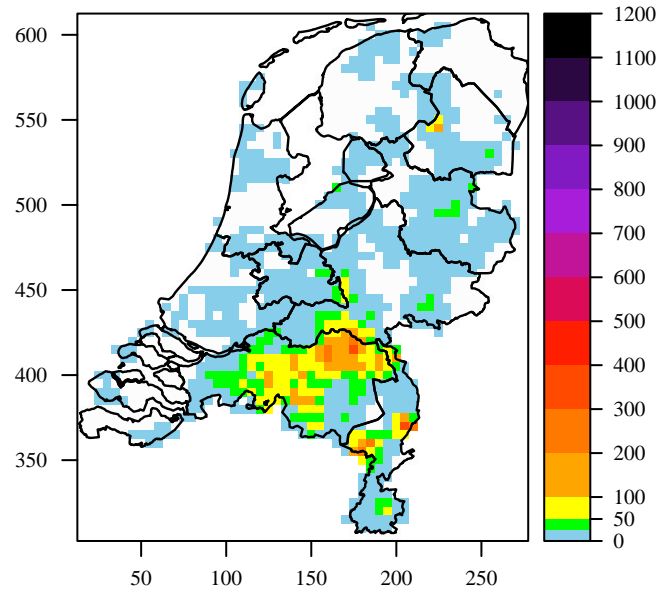**Residuals**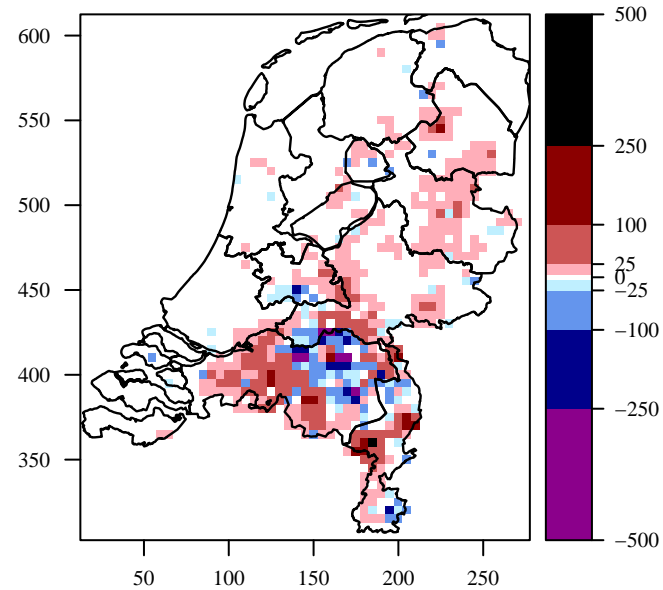

Supplement: mmc13.pdf [file mmc13.pdf]

**Observed incidence**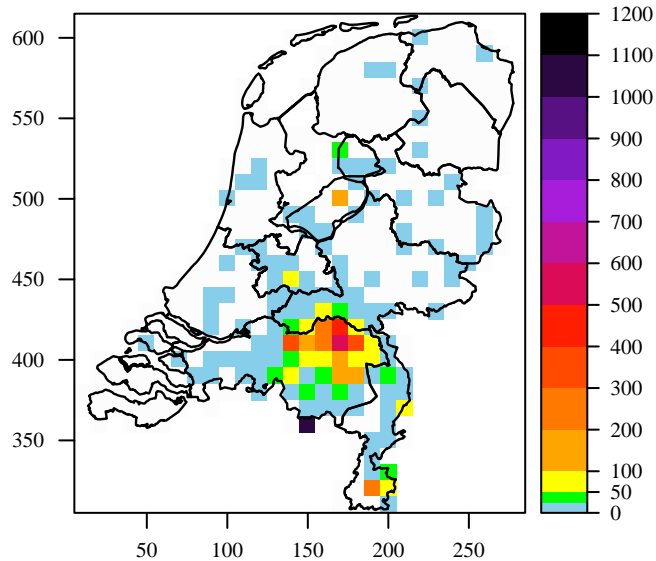**Predicted incidence**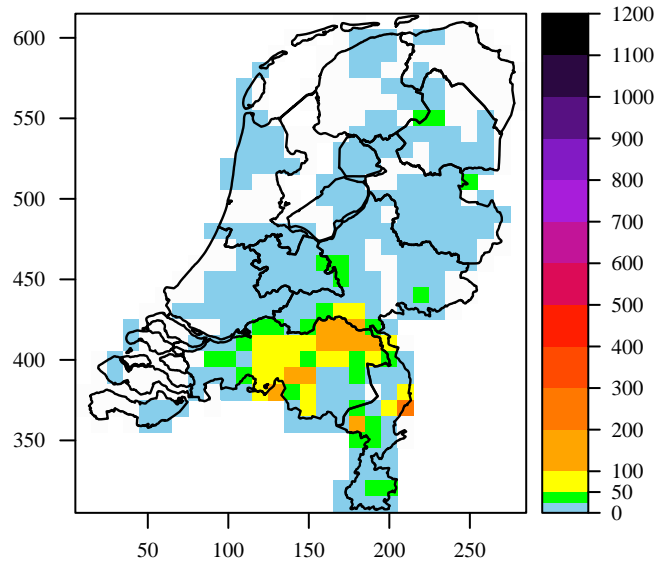**Residuals**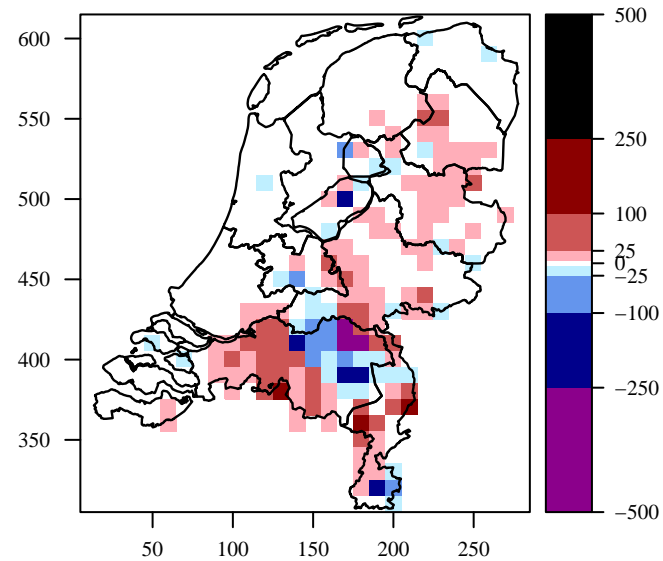

Supplement: mmc14.pdf [file mmc14.pdf]

# Cross validation results

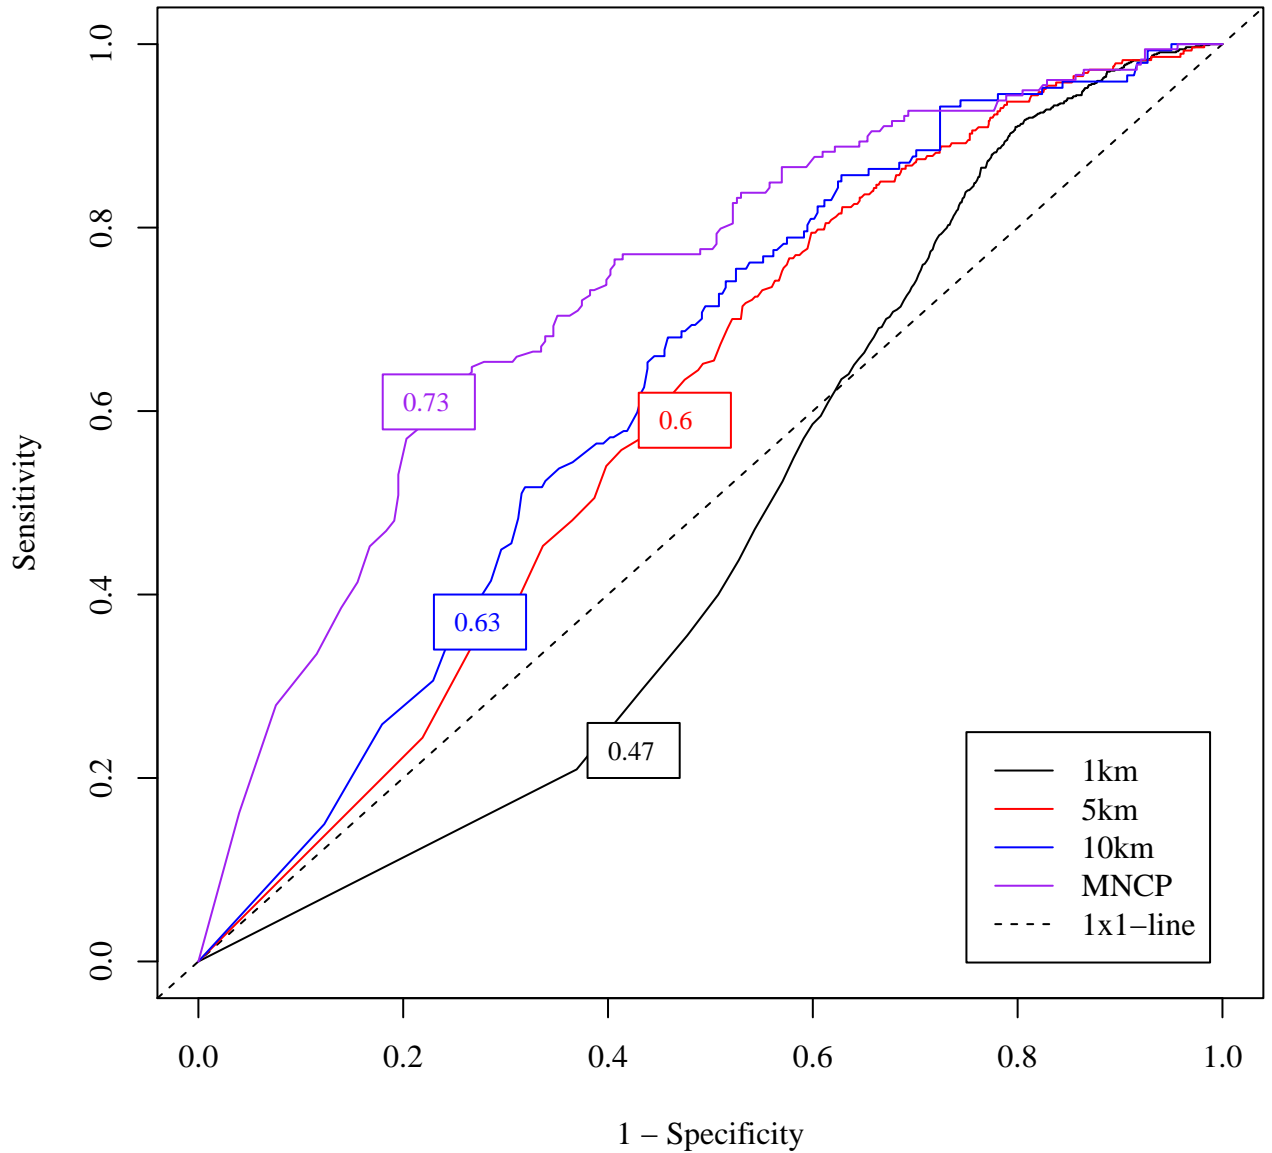

Supplement: mmc15.pdf [file mmc15.pdf]

Mean LAI [  $\text{m}^2/\text{m}^2$  ] per  $\text{km}^2$  (2009)

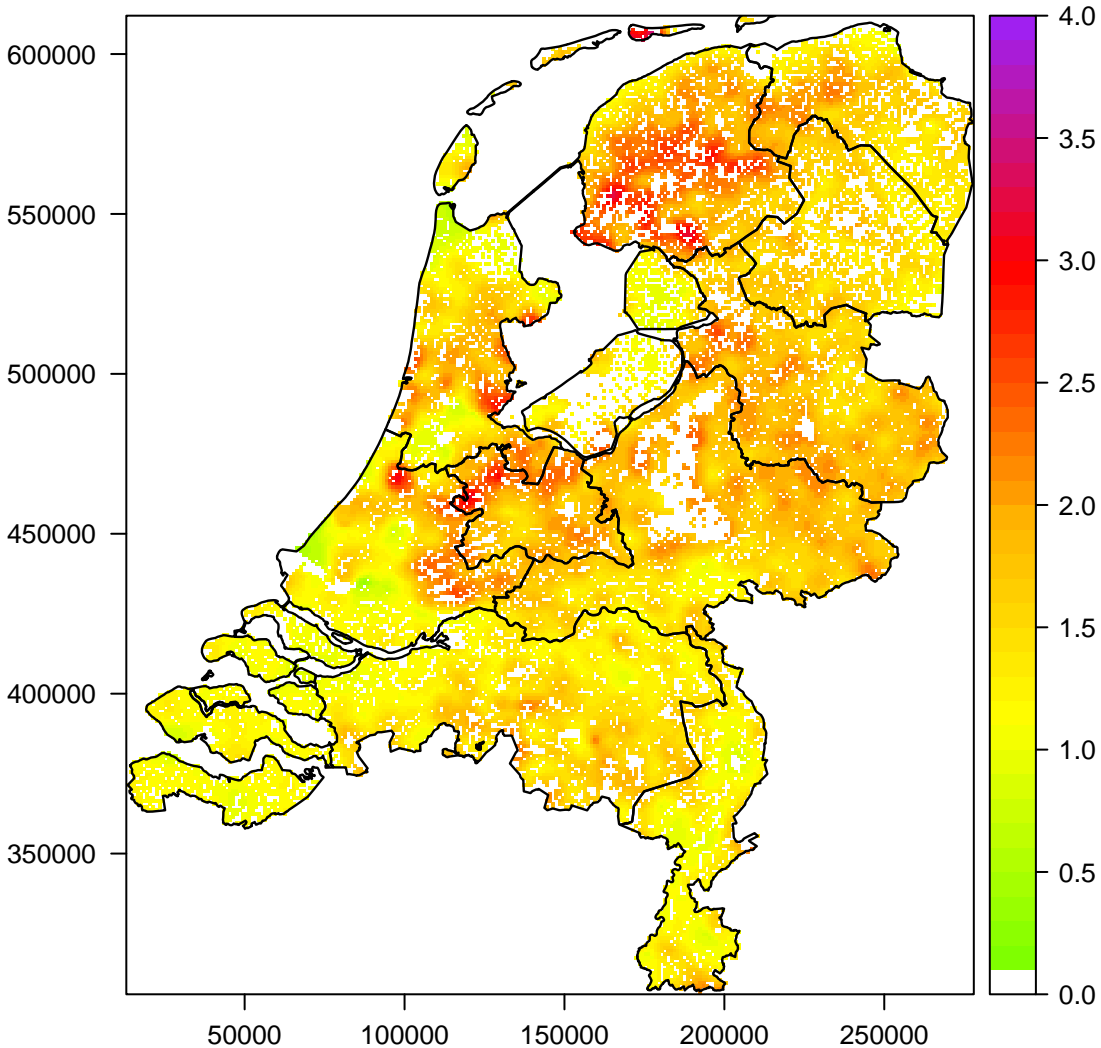

Supplement: mmc3.pdf [file mmc3.pdf]

Mean SM [ % ] per km<sup>2</sup> (2009)

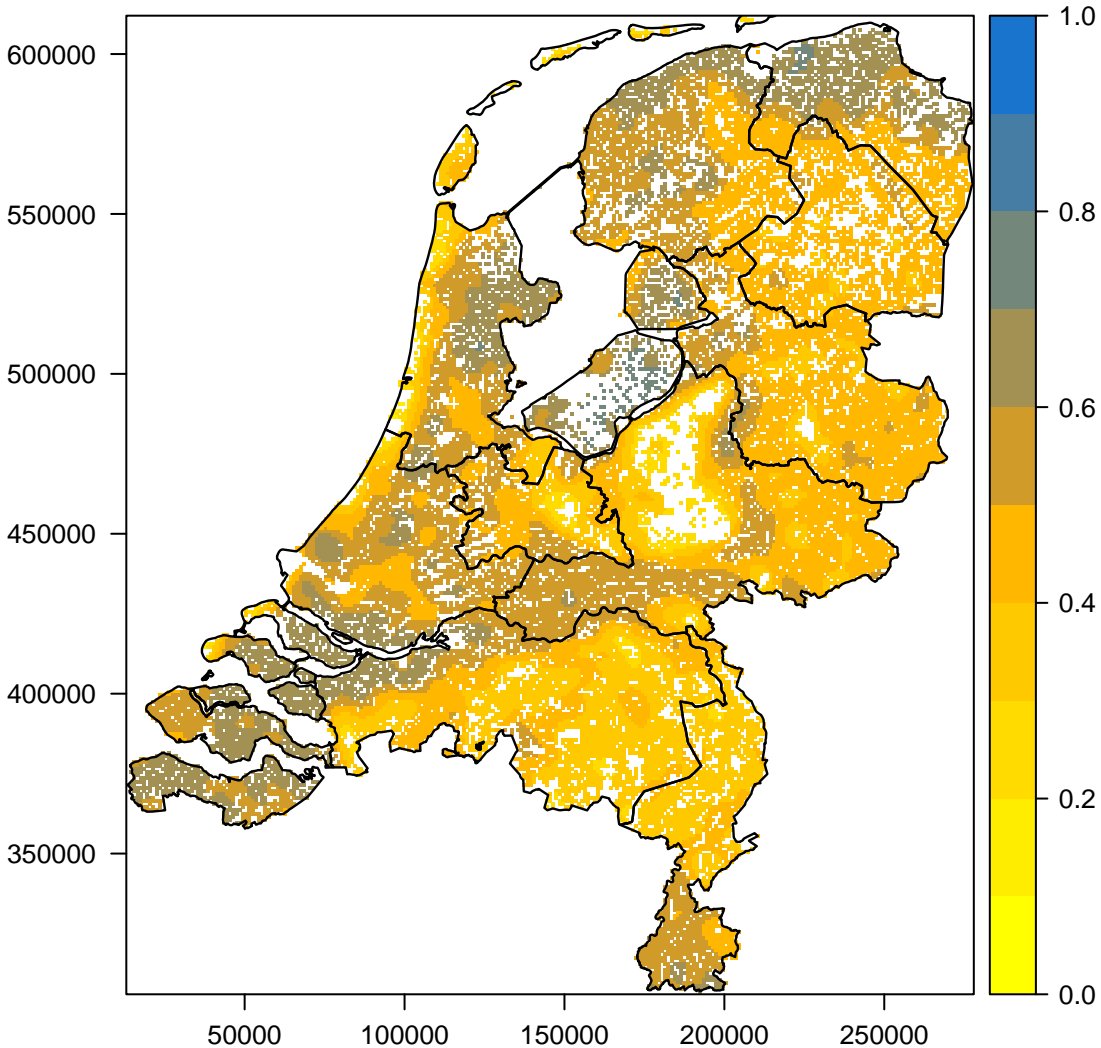

Supplement: mmc5.pdf [file mmc5.pdf]

# Land Use Map of the Netherlands

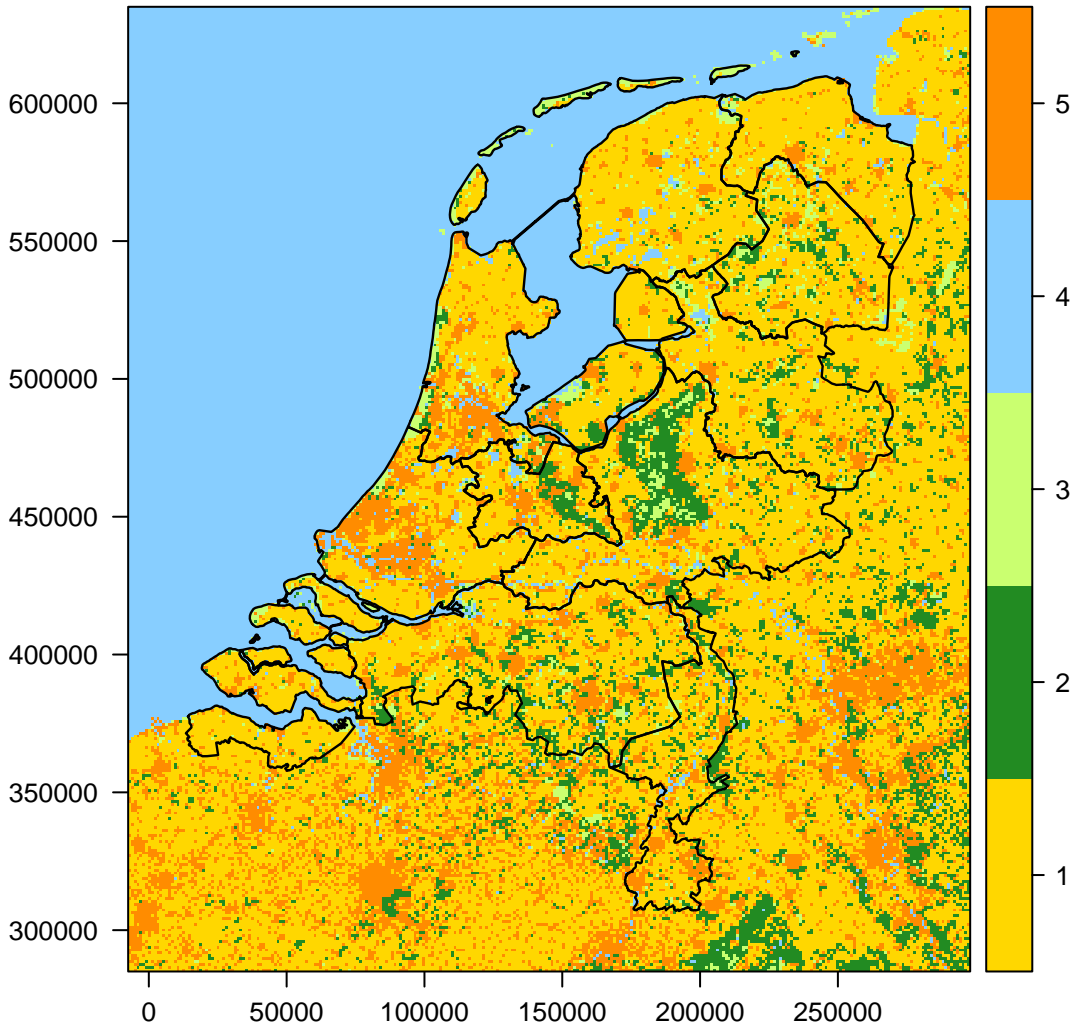

Supplement: mmc7.pdf [file mmc7.pdf]
